# Supplementary material for: Synthesis of novel insensitive heat-resistant explosives based on a fused-tricyclic skeleton
Source: Royal Society of Chemistry journal article supplement (doi:10.1039/d4nj03802a), 2024-01-01
Supplement: d4nj03802a1.pdf [file d4nj03802a1.pdf]

## Supporting Information

### **Synthesis of novel insensitive heat-resistant explosive based on the fused-tricyclic skeleton**

Gan Jin, Caijin Lei, Guangbin Cheng <sup>\*</sup>, Hongwei Yang <sup>\*</sup>

*School of Chemistry and Chemical Engineering, Nanjing University of Science and Technology,  
Nanjing 210094, China*

*\* Corresponding author. E-mail addresses: [gcheng@mail.njust.edu.cn](mailto:gcheng@mail.njust.edu.cn) (Guangbin Cheng),  
[hyang@mail.njust.edu.cn](mailto:hyang@mail.njust.edu.cn) (Hongwei Yang)*

## Table of Contents

|                                                                             |   |
|-----------------------------------------------------------------------------|---|
| 1. Computational details .....                                              | 3 |
| 2. The experiment and crystallographic data .....                           | 5 |
| 3. $^1\text{H}$ and $^{13}\text{C}$ NMR spectra for all new compounds ..... | 8 |

## 1. Computational details

The calculation was performed by using the Gaussian 09 program package<sup>1</sup>. The geometric optimization of all the structures and frequency analyses for calculation of heats of formation was carried out by using B3-LYP functional<sup>2</sup> with 6-311+G\*\* basis set<sup>3,4</sup>. All of the optimized structures were characterized to be local energy minima on the potential surface without any imaginary frequencies. The heat of formation (HOF) of these compounds were computed through appropriate isodesmic reactions (Scheme S1). All the optimized structures were characterized to be true local energy minima on the potential-energy surface without imaginary frequencies.

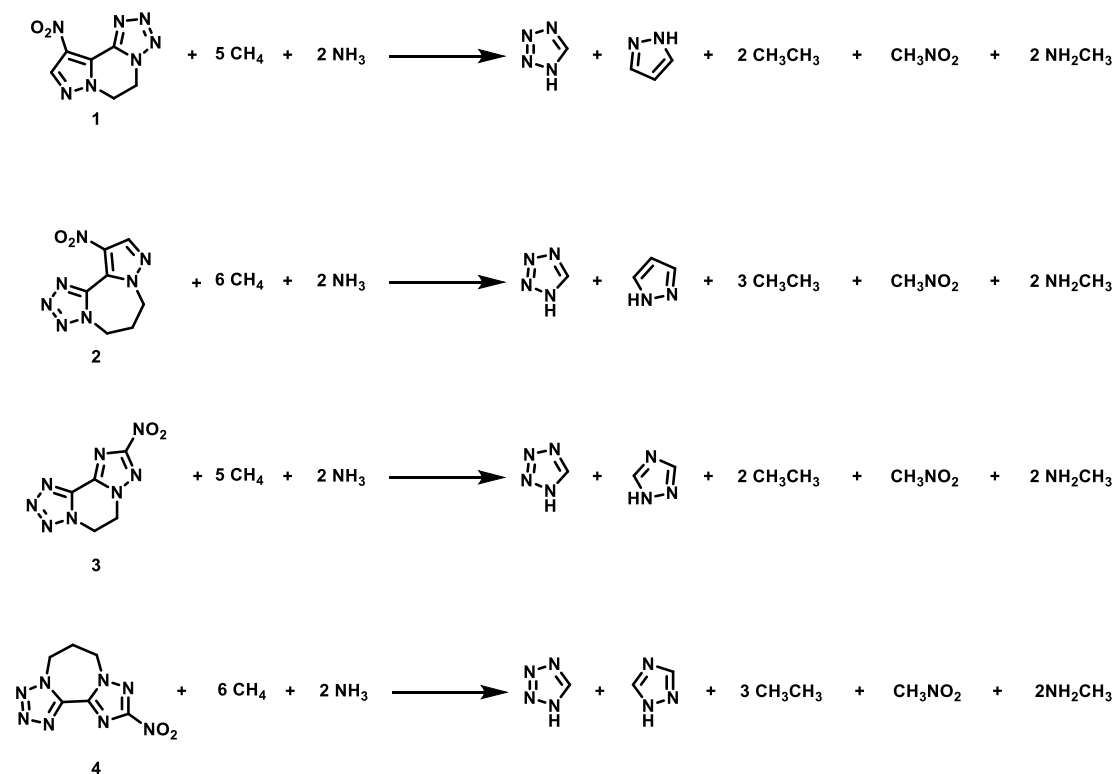

**Scheme S1** Isodesmic and tautomeric reactions to compute the HOF.

**Table S1** Total energy and heat of formation for the reference compounds

| Compound                        | E <sub>0</sub> /a.u. | ZPE/kJ.mol <sup>-1</sup> | H <sub>T</sub> /kJ.mol <sup>-1</sup> | HOF/kJ.mol <sup>-1</sup> |
|---------------------------------|----------------------|--------------------------|--------------------------------------|--------------------------|
| CH <sub>4</sub>                 | -40.5339             | 112.26                   | 10.04                                | -74.6                    |
| NH <sub>3</sub>                 | -56.5826             | 86.27                    | 10.05                                | -45.9                    |
| CH <sub>3</sub> CH <sub>3</sub> | -79.8565             | 187.31                   | 11.79                                | -84                      |
| CH <sub>3</sub> NO <sub>2</sub> | -245.0916            | 124.9                    | 11.6                                 | -74.3                    |
| CH <sub>3</sub> NH <sub>2</sub> | -95.8938             | 160.78                   | 11.64                                | -22.5                    |

|                                                                                   |           |        |       |       |
|-----------------------------------------------------------------------------------|-----------|--------|-------|-------|
|  | -258.3241 | 117.69 | 11.8  | 334.3 |
|  | -226.2603 | 179.2  | 12.57 | 177.4 |
|  | -242.3204 | 150.39 | 12.06 | 192.7 |

The change of enthalpy for the reactions at 298K can be expressed by Equation (1):

$$\Delta H_{298} = \sum \Delta_f H_P - \sum \Delta_f H_R \quad (1)$$

Where  $\sum \Delta_f H_P$  and  $\sum \Delta_f H_R$  are the HOF of reactants and products at 298 K, respectively, and  $\Delta H_{298}$  can be calculated from the following expression in Equation (2):

$$\Delta H_{298} = \Delta E_{298} + \Delta(PV) = \Delta E_0 + \Delta ZPE + \Delta H_T + \Delta nRT \quad (2)$$

$\Delta E_0$  = the change in total energy between the products and the reactants at 0 K;  $\Delta ZPE$  = the difference between the zero-point energies (ZPE) of the products and the reactants at 0 K;  $\Delta H_T$  = the thermal correction from 0 to 298 K;  $\Delta(PV) = \Delta nRT$ . For the isodesmic reactions  $\Delta n = 0$ , so  $\Delta(PV) = 0$ .

On the left side of Equation (2), apart from target compound all the others are called reference compounds. The HOF of reference compounds are available either from experiments or from high level computing such as CBS-4M.

Based on a Born-Haber energy cycle (Scheme S2), the heats of formation of the salts were obtained by Equation (3):

$$\Delta H_f^\circ(\text{ionic salt, 298 K}) = \Delta H_f^\circ(\text{cation, 298 K}) + \Delta H_f^\circ(\text{anion, 298 K}) - \Delta H_L \quad (3)$$

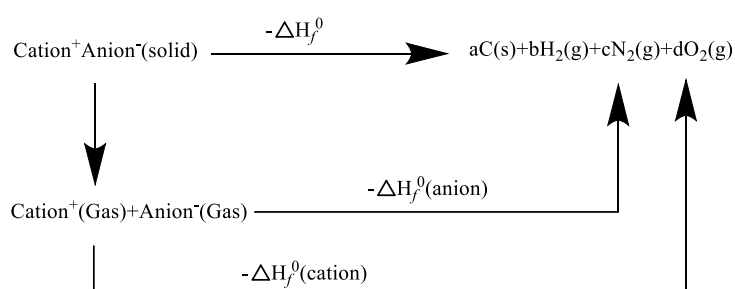

Scheme S2 Born-Haber cycle for the formation of energetic salts

Where  $\Delta H_L$  is the lattice energy of the salt which could be predicted by the formula suggested by Jenkins et al. as given in Equation (4):

$$\Delta H_L = UPOT + [p(nM/2-2) + q(nX/2-2)] RT \quad (4)$$

Where  $n_M$  and  $n_X$  depend on the nature of the ions  $M_{p+}$  and  $X_{q-}$ , respectively, and are equal to 3 for monatomic ions, 5 for linear polyatomic ions, and 6 for nonlinear polyatomic ions.

The equation for lattice potential energy UPOT takes the form of equation (5):

$$\text{UPOT (kJ}\cdot\text{mol}^{-1}) = \gamma (\rho_m / M_m)^{1/3+\delta} \quad (5)$$

$\rho_m$  = the density ( $\text{g}\cdot\text{cm}^{-3}$ ),  $M_m$  = the chemical formula mass of the ionic material.

## 2. The experiment and crystallographic data

### General methods

Reagents were purchased from Aldrich and Acros Organics and are used as received.  $^1\text{H}$  and  $^{13}\text{C}$  NMR spectra are recorded on a 300 MHz (Bruker AVANCE 300) NMR spectrometer operating at 300 and 75.0 MHz, respectively. The decomposition points are obtained on a differential scanning calorimeter at a heating rate of  $10\text{ }^\circ\text{C min}^{-1}$ . IR spectra are recorded on a FT-IR spectrometer (Thermo Nicolet AVATAR 370) as thin films by using KBr plates. Densities are determined at  $25\text{ }^\circ\text{C}$  by employing a Micromeritics AccuPyc II 1340 gas pycnometer. Elemental analyses were carried out by using a Vario Micro cube Elementar Analyser. Impact and friction sensitivity measurements are made by using a standard BAM Fall hammer and a BAM friction tester. Detonation velocity and detonation pressure data are calculated by program package EXPLO5 (version 6.01).

### X-ray crystallography

The data for **1-4** were collected with a Bruker SMART APEX II CCD diffractometer with graphite-monochromated MoK $\alpha$  radiation ( $\lambda = 1.54178\text{ nm}$ ) or CuK $\alpha$  ( $\lambda = 0.71073\text{ nm}$ ) at 193 K. The data collection and the initial unit cell refinement are performed by using APEX2 (v2010.3-0). Data Reduction is performed by using SAINT (v7.68A) and XPREP (v2008/2). Empirical absorption corrections are applied by using the SADABS (v2008/1) program. The structures are solved by direct methods and refined by the full matrix least-squares based on F2 using SHELXTL-2014/7 (Sheldrick, 2014) programme package. All non-hydrogen atoms were refined anisotropically. The hydrogen atoms attached to ligands are included using a riding model. The crystallographic data and CCDC numbers for these compounds are summarized in Table S2.

**Table S2** Crystallographic Data for **1-4**

| Compound                                | 1                                                           | 2                                                                   | 3                                                                   | 4                                                                   |
|-----------------------------------------|-------------------------------------------------------------|---------------------------------------------------------------------|---------------------------------------------------------------------|---------------------------------------------------------------------|
| CCDC                                    | 2356449                                                     | 2356448                                                             | 2326589                                                             | 2326592                                                             |
| Formula                                 | C <sub>6</sub> H <sub>5</sub> N <sub>7</sub> O <sub>2</sub> | C <sub>7</sub> H <sub>7</sub> N <sub>7</sub> O <sub>2</sub>         | C <sub>5</sub> H <sub>4</sub> N <sub>8</sub> O <sub>2</sub>         | C <sub>6</sub> H <sub>6</sub> N <sub>8</sub> O <sub>2</sub>         |
| Formula weight                          | 207.17                                                      | 221.20                                                              | 208.16                                                              | 222.19                                                              |
| Temperature/K                           | 233                                                         | 223                                                                 | 198                                                                 | 193                                                                 |
| Crystal system                          | monoclinic                                                  | orthorhombic                                                        | monoclinic                                                          | monoclinic                                                          |
| space group                             | P2 <sub>1</sub> /c                                          | P2 <sub>1</sub> 2 <sub>1</sub> 2 <sub>1</sub>                       | P2 <sub>1</sub> /n                                                  | P2 <sub>1</sub> /n                                                  |
| a/Å                                     | 6.3809(6)                                                   | 6.7579(3)                                                           | 6.3057(2)                                                           | 14.5684(4)                                                          |
| b/Å                                     | 10.3716(8)                                                  | 8.4422(4)                                                           | 9.7520(3)                                                           | 9.3480(3)                                                           |
| c/Å                                     | 12.1362(10)                                                 | 16.3524(6)                                                          | 13.0730(4)                                                          | 15.0235(4)                                                          |
| α/°                                     | 90                                                          | 90                                                                  | 90                                                                  | 90                                                                  |
| β/°                                     | 91.201(6)                                                   | 90                                                                  | 94.800(2)                                                           | 117.776(2)                                                          |
| γ/°                                     | 90                                                          | 90                                                                  | 90                                                                  | 90                                                                  |
| Volume/Å <sup>3</sup>                   | 803.00(12)                                                  | 932.93(7)                                                           | 801.08(4)                                                           | 1810.24(10)                                                         |
| Z                                       | 4                                                           | 4                                                                   | 4                                                                   | 4                                                                   |
| ρ <sub>calc</sub> / mg·mm <sup>-3</sup> | 1.714                                                       | 1.575                                                               | 1.726                                                               | 1.631                                                               |
| μ/mm <sup>-1</sup>                      | 1.176                                                       | 1.052                                                               | 1.220                                                               | 1.120                                                               |
| F (000)                                 | 424.0                                                       | 456.0                                                               | 424.0                                                               | 912.0                                                               |
| Crystal size /mm <sup>3</sup>           | 0.12×0.11×0.1                                               | 0.13×0.11×0.1                                                       | 0.11×0.1×0.09                                                       | 0.13×0.11×0.1                                                       |
| 2θ/°                                    | 11.222 to<br>136.502                                        | 11.796 to<br>136.676                                                | 11.334 to 136.03                                                    | 11.572 to<br>136.478                                                |
| Index ranges                            | -7 ≤ h ≤ 7, -12 ≤<br>k ≤ 12, -14 ≤ l ≤<br>14                | -8 ≤ h ≤ 8, -10 ≤<br>k ≤ 10, -19 ≤ l ≤<br>19                        | -7 ≤ h ≤ 7, -11 ≤<br>k ≤ 11, -15 ≤ l ≤<br>15                        | -17 ≤ h ≤ 12, -<br>11 ≤ k ≤ 11, -<br>14 ≤ l ≤ 18                    |
| Reflections<br>collected                | 8695                                                        | 8704                                                                | 7173                                                                | 13050                                                               |
| Independent<br>reflections              | 8695 [R <sub>int</sub> =?,<br>R <sub>sigma</sub> = 0.0892]  | 1700 [R <sub>int</sub> =<br>0.0510, R <sub>sigma</sub> =<br>0.0312] | 1700 [R <sub>int</sub> =<br>0.0528, R <sub>sigma</sub> =<br>0.0302] | 1700 [R <sub>int</sub> =<br>0.0427, R <sub>sigma</sub> =<br>0.0324] |
| Data/restraints/par<br>ameters          | 8695/0/137                                                  | 1700/0/145                                                          | 1452/6/155                                                          | 3240/18/299                                                         |
| Goodness-of-fit on<br>F <sup>2</sup>    | 1.039                                                       | 1.049                                                               | 1.078                                                               | 1.073                                                               |
| Final R indexes<br>[I ≥ 2σ (I)]         | R1 = 0.0575,<br>wR2 = 0.1583                                | R1 = 0.0378,<br>wR2 = 0.0986                                        | R1 = 0.0314,<br>wR2 = 0.0771                                        | R1 = 0.0423,<br>wR2 = 0.1139                                        |

|                                               |                              |                                                      |                              |                              |
|-----------------------------------------------|------------------------------|------------------------------------------------------|------------------------------|------------------------------|
| Final R indexes [all data]                    | R1 = 0.0789,<br>wR2 = 0.1739 | R <sub>1</sub> = 0.0442,<br>wR <sub>2</sub> = 0.1013 | R1 = 0.0431,<br>wR2 = 0.0825 | R1 = 0.0495,<br>wR2 = 0.1196 |
| Largest diff./<br>peak/hole/e Å <sup>-3</sup> | 0.37/-0.41                   | 0.40/-0.21                                           | 0.19/-0.17                   | 0.30/-0.20                   |

**Table S3** Hydrogen bonds present in **1-4**

| Compound | D-H...A       | <i>d</i> (D-H)/Å | <i>d</i> (H...A)/Å | <i>d</i> (D...A)/Å | <(DHA)/(°) |
|----------|---------------|------------------|--------------------|--------------------|------------|
| <b>1</b> | C1-H1A...N4   | 0.9800           | 2.4600             | 3.098(4)           | 122.0      |
|          | C1-H1B...N6   | 0.9800           | 2.6000             | 3.528(4)           | 157.0      |
| <b>2</b> | C1-H1...O1    | 0.9400           | 2.4900             | 3.321(4)           | 147.0      |
|          | C5-H5A...O2   | 0.9800           | 2.4200             | 3.328(4)           | 155.0      |
| <b>3</b> | C4B-H4BB...O1 | 0.9900           | 2.54               | 3.157(4)           | 120.0      |
|          | C5B-H5BA...N3 | 0.9900           | 2.53               | 3.369(13)          | 143.0      |
| <b>4</b> | C5-H5B...N10  | 0.9900           | 2.58               | 3.283(3)           | 128.0      |
|          | C6-H6A...N15  | 0.9900           | 2.56               | 3.372(3)           | 140.0      |

### 3. $^1\text{H}$ and $^{13}\text{C}$ NMR spectra for all new compounds

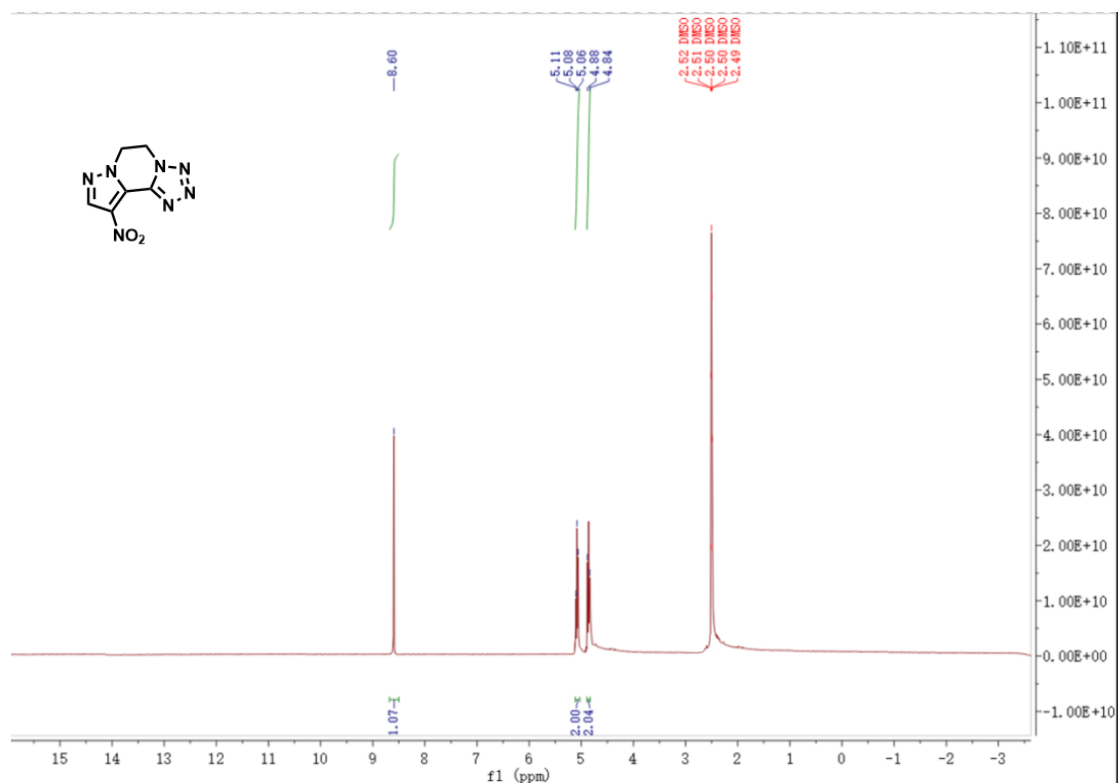

Figure S1  $^1\text{H}$  NMR spectra (300 MHz) of 1 in [D6] DMSO at 25 °C

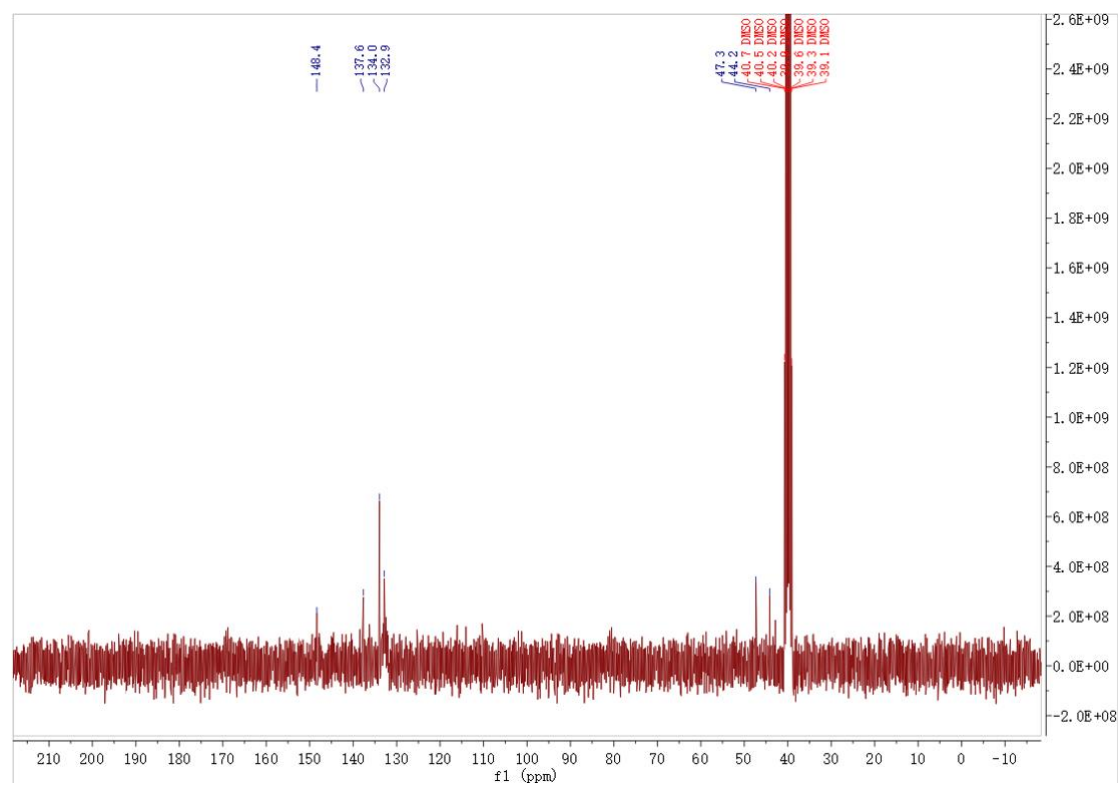

Figure S2  $^{13}\text{C}$  NMR spectra (75 MHz) of 1 in [D6] DMSO at 25 °C.



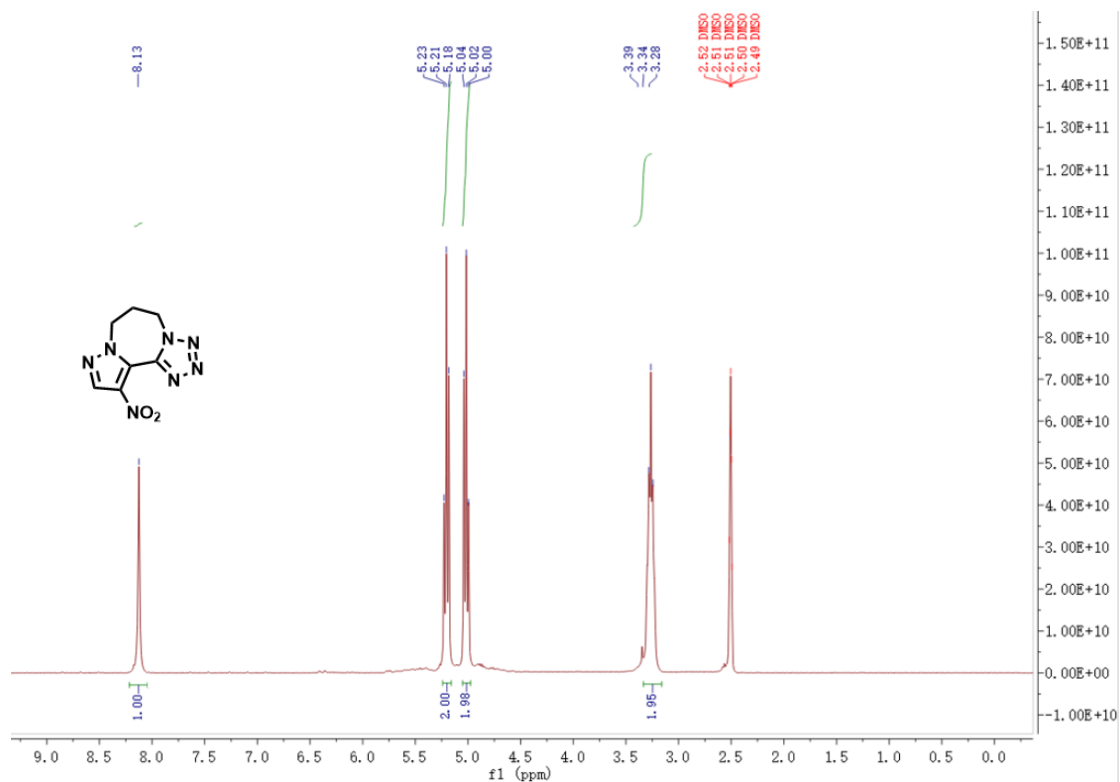

Figure S3 <sup>1</sup>H NMR spectra (300 MHz) of **2** in [D<sub>6</sub>] DMSO at 25 °C

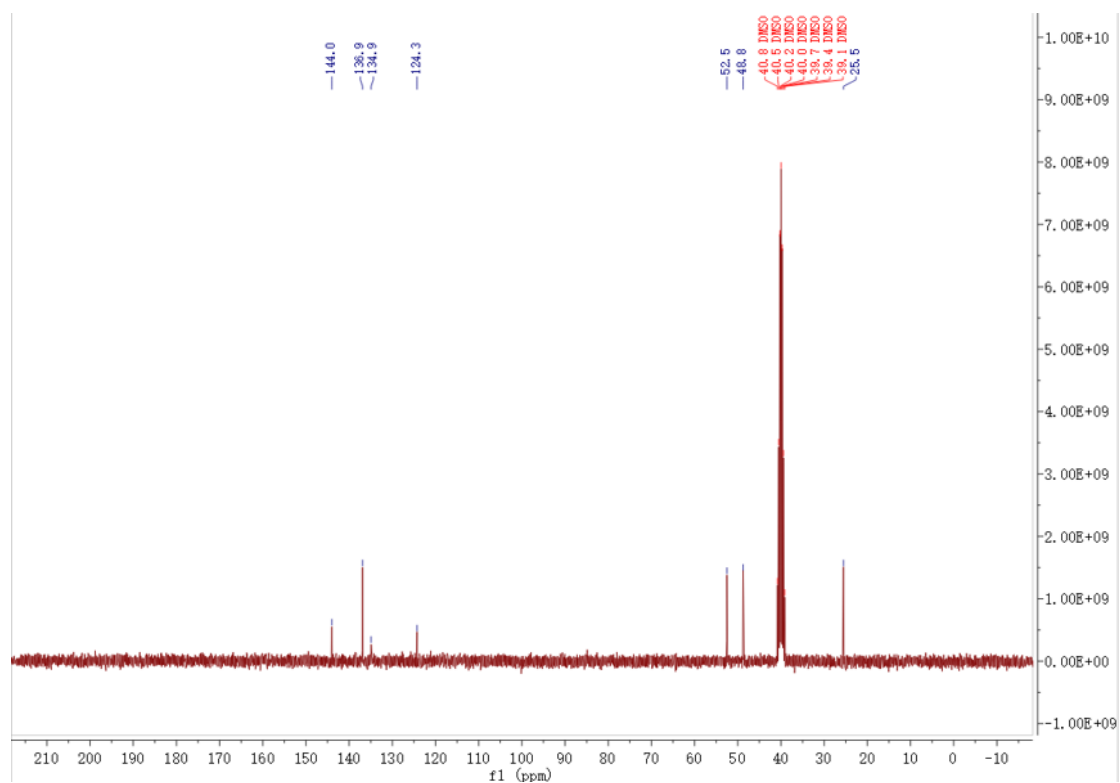

Figure S4 <sup>13</sup>C NMR spectra (75 MHz) of **2** in [D<sub>6</sub>] DMSO at 25 °C.

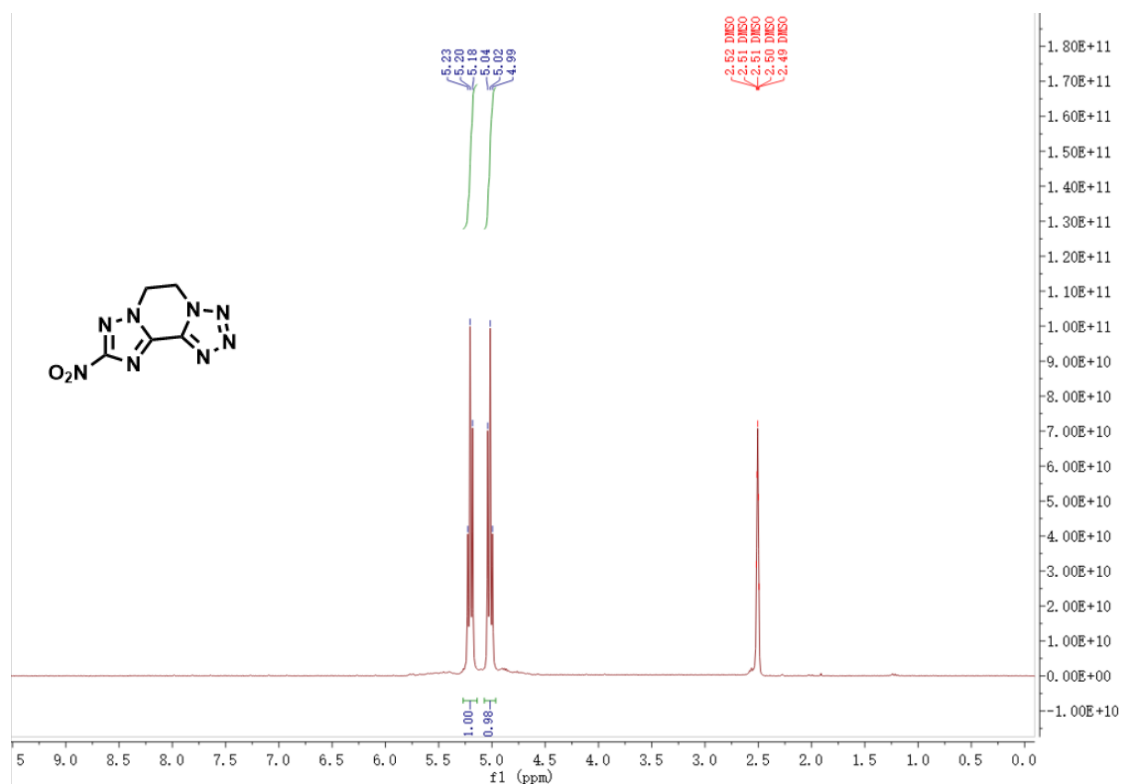

Figure S5  $^1\text{H}$  NMR spectra (300 MHz) of **3** in  $[\text{D}_6]$  DMSO at 25  $^\circ\text{C}$

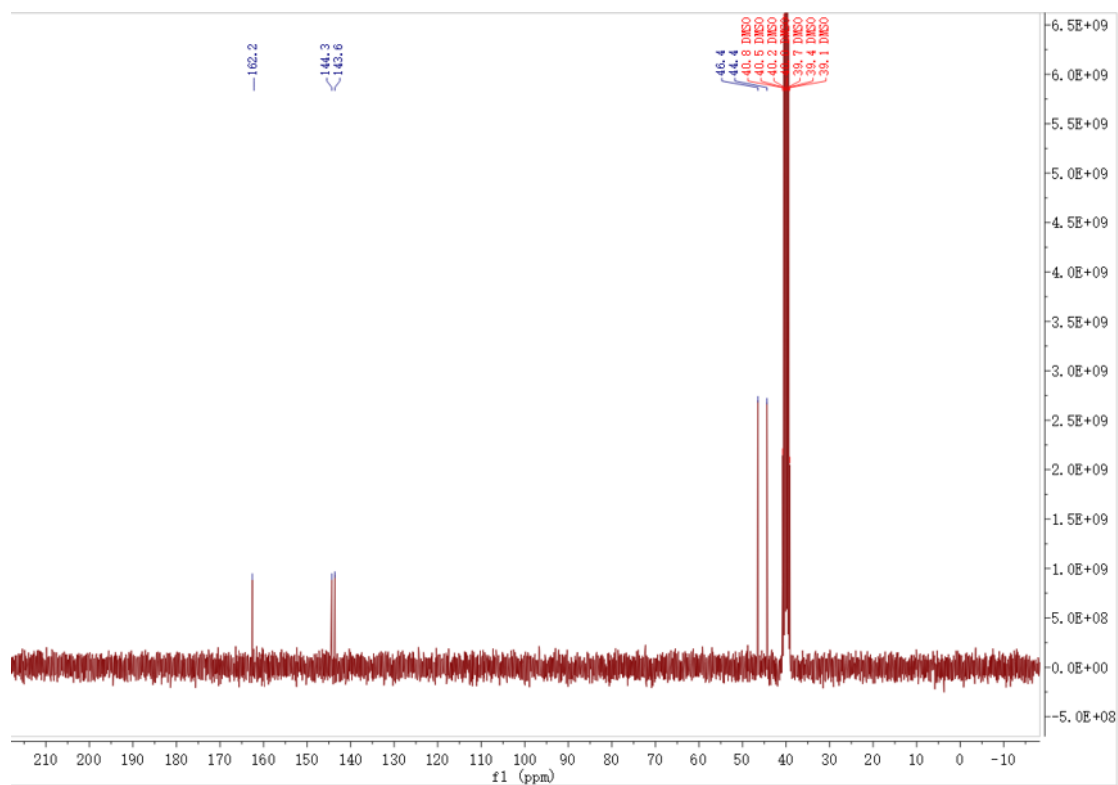

Figure S6  $^{13}\text{C}$  NMR spectra (75 MHz) of **3** in  $[\text{D}_6]$  DMSO at 25  $^\circ\text{C}$ .

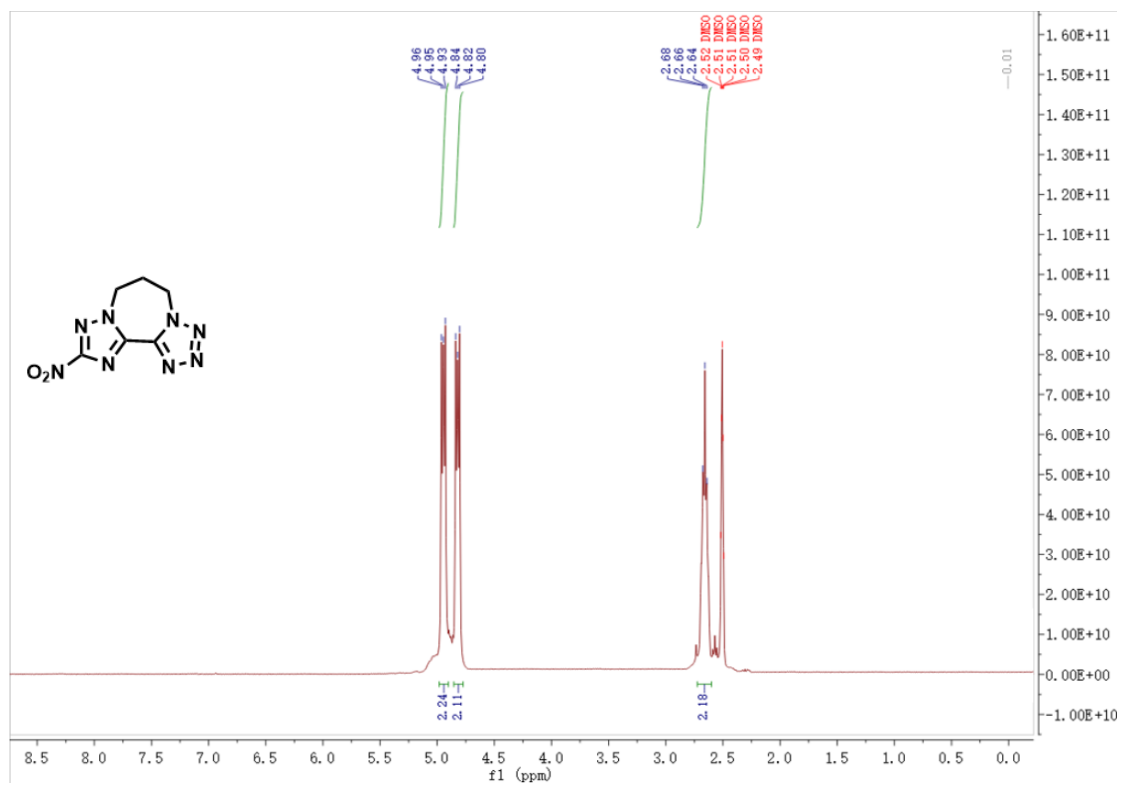

Figure S7  $^1\text{H}$  NMR spectra (300 MHz) of **4** in [D<sub>6</sub>] DMSO at 25 °C

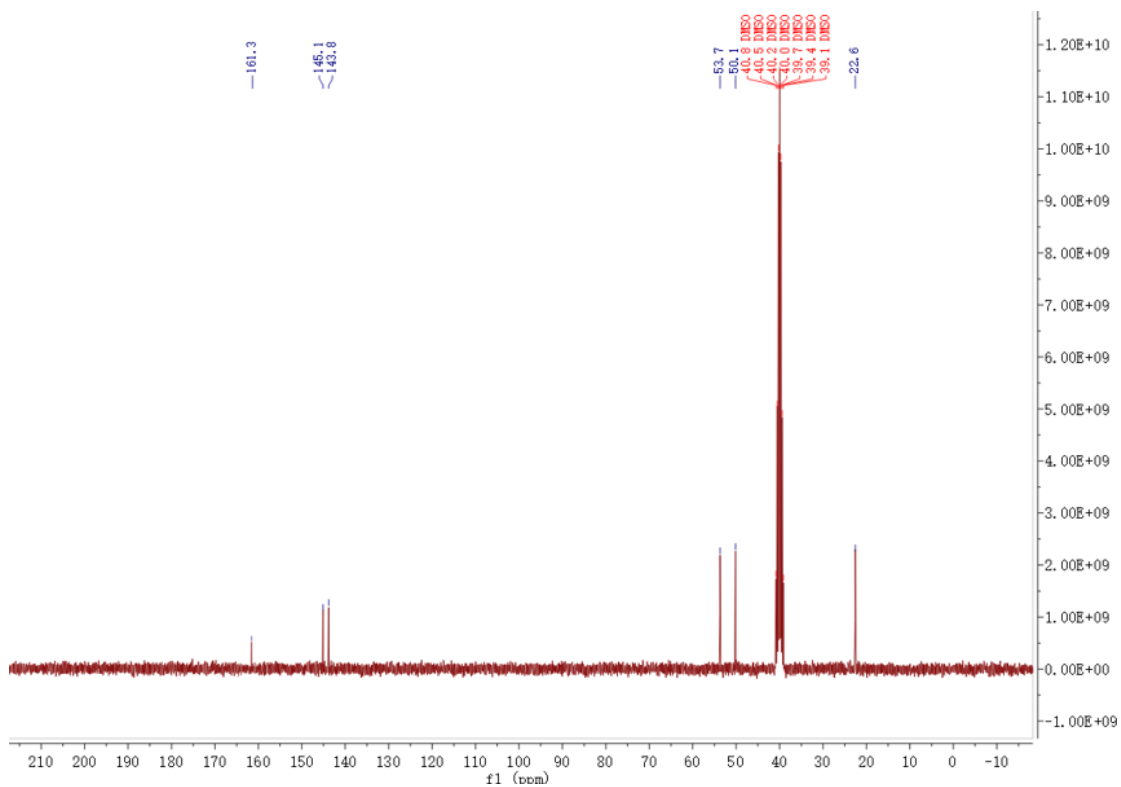

Figure S8  $^{13}\text{C}$  NMR spectra (75 MHz) of **4** in [D<sub>6</sub>] DMSO at 25 °C.
